# Supplementary material for: Effects of Hst3p inhibition in Candida albicans: a genome-wide H3K56 acetylation analysis
Source: Front Cell Infect Microbiol. 2022 Oct 27;12:1031814. doi: 10.3389/fcimb.2022.1031814 (PMC9647175; doi:10.3389/fcimb.2022.1031814)
Supplement: Supplementary file 3 [file Table_2.xlsx]

## Sheet: Foglio1
Supplemetary Table 2: Correlation between RNA-seq up-regulated genes and CaNAM ChIP-enriched promoters
Gene_ID	Gene_Name	FC_CaNAM_vs_CTRL	FDR_CaNAM_vs_CTRL
C1_01520C_A	SOD2	1.58004	3.19896e-05
C1_01920W_A	ROA1	2.98446	9.56758e-05
C1_02390W_A		2.95969	1.3983e-18
C1_02470W_A		2.3318	0.00114539
C1_03240W_A		2.45342	5.53853e-09
C1_03840W_A		2.27398	0.00629262
C1_04310C_A	GIG1	6.95589	8.21615e-15
C1_06150W_A		14.187	2.01516e-11
C1_06340W_A		6.05895	3.04386e-17
C1_07040C_A		5.94297	0.000102969
C1_07330W_A	RME1	12.7432	7.90163e-47
C1_07610C_A		3.08894	3.94063e-05
C1_07880C_A	GCS1	1.95601	2.16047e-05
C1_07960W_A		1.99504	0.00405432
C1_08070W_A	CDR4	4.23496	3.37152e-17
C1_09160W_A	AOX1	2.66602	1.53528e-18
C1_09540W_A		1.76135	0.000219765
C1_09550W_A		1.88624	0.0448459
C1_09710C_A		1.52612	0.0273538
C1_10150W_A	WOR1	14.0241	2.56058e-08
C1_10630C_A		1.67311	0.00206539
C1_11340W_A	PRM1	1.94073	0.000679745
C1_11370C_A		1.62991	5.39615e-05
C1_11700C_A	MRF1	4.22004	8.81277e-66
C1_13080W_A	OP4	13.2212	9.9315e-10
C1_13440C_A	OFI1	629.349	1.98975e-13
C1_13450W_A	HYR1	15.7274	4.84589e-46
C1_13740W_A	KAR9	1.68967	0.0126444
C1_13750C_A		1.627	0.0302121
C2_00880W_A		2.20754	8.86884e-09
C2_00890W_A		1.78974	0.0148334
C2_02400W_A	ECM3	1.90412	0.000199324
C2_05320W_A	CDC7	1.86297	4.08938e-05
C2_05640W_A		1.67482	2.98561e-07
C2_07790C_A		5.90974	4.0075e-21
C2_10000C_A		3.52821	0.00262811
C3_00330W_A	UTP8	1.60697	0.00113883
C3_02300W_A	FGR23	3.02593	4.33014e-10
C3_02330C_A		11.192	8.96197e-16
C3_02390W_A		1.83751	8.96636e-05
C3_02550C_A	DCG1	5.90076	1.70131e-11
C3_02660W_A		2.04528	0.0309244
C3_02750W_A		22.9297	3.58578e-20
C3_03720W_A	GTT11	1.96303	2.20419e-10
C3_05170W_A	WOR2	9.76608	1.09184e-22
C3_05720C_A	KIP3	1.59129	0.00329804
C3_07160W_A	PGA32	3.67026	4.57104e-14
C4_00920C_A		1.70388	0.000952854
C4_01650C_A		1.50344	0.000161754
C4_03570W_A	HWP1	68.8832	1.02668e-20
C4_04070C_A	PGA30	103.422	5.63601e-17
C4_05970W_A		1.84964	2.23657e-15
C4_06590W_A	CCJ1	1.94256	0.0128806
C4_06600W_A	TOP2	1.62659	6.53979e-06
C5_00710W_A	IFF8	5.46246	5.63601e-17
C5_01360W_A	CFL4	16.4889	5.69683e-21
C5_01570C_A	SPO1	3.19376	8.54497e-08
C5_01670W_A	DAL52	2.23861	0.00585671
C5_02860C_A	GRP2	4.68574	1.45492e-23
C5_03080C_A		1.55484	0.000767323
C5_03460C_A		2.04099	8.11692e-07
C5_03470C_A		1.64232	0.0017146
C5_04230W_A	MRV6	38.1703	5.4665e-05
C6_00290W_A		2.07651	0.00249503
C6_01680C_A	GBU1	6.62299	6.95552e-21
C6_01810W_A		2.49529	0.00184946
C6_02330W_A		2.90285	1.49341e-15
C6_02830W_A	MNN45	6.79308	3.94684e-20
C6_03110C_A		3.75474	1.30104e-07
C6_03490C_A	SAP1	2.06781	5.96747e-05
C7_01520W_A	FLU1	2.1222	1.43001e-07
C7_01840W_A	IQG1	6.35768	6.40211e-58
C7_03560W_A		1.98856	4.40283e-06
C7_03570W_A	ARG4	4.19602	1.04973e-39
C7_04230W_A	NRG1	2.60439	0.00027748
CR_00010C_A		2.15039	0.0100764
CR_00060C_A		1.52429	6.1825e-05
CR_01330W_A	CPA2	8.28243	1.43081e-86
CR_04710W_A		5.56556	1.02211e-08
CR_06870C_A		10.3133	5.0878e-07
CR_07060C_A	CRZ2	1.95266	0.00344795
CR_07440W_A	ACE2	11.4888	2.49435e-22
CR_07800W_A	SAP2	24.6734	2.30408e-85
CR_07810W_A	YHB5	2.75964	7.98795e-15
CR_09700W_A		5.41051	1.2115e-34
CR_09890C_A	BET2	1.82848	0.000129865
CR_10180W_A		5.5947	2.76229e-14
